# Supplementary material for: Co-Inoculation of Bradyrhizobium spp. and Bacillus sp. on Tarwi (Lupinus mutabilis Sweet) in the High Andean Region of Peru
Source: MDPI journal article supplement (doi:10.3390/agronomy12092132), 2022-09-08
Supplement: s1 [file s1]

## SUPPLEMENTARIES

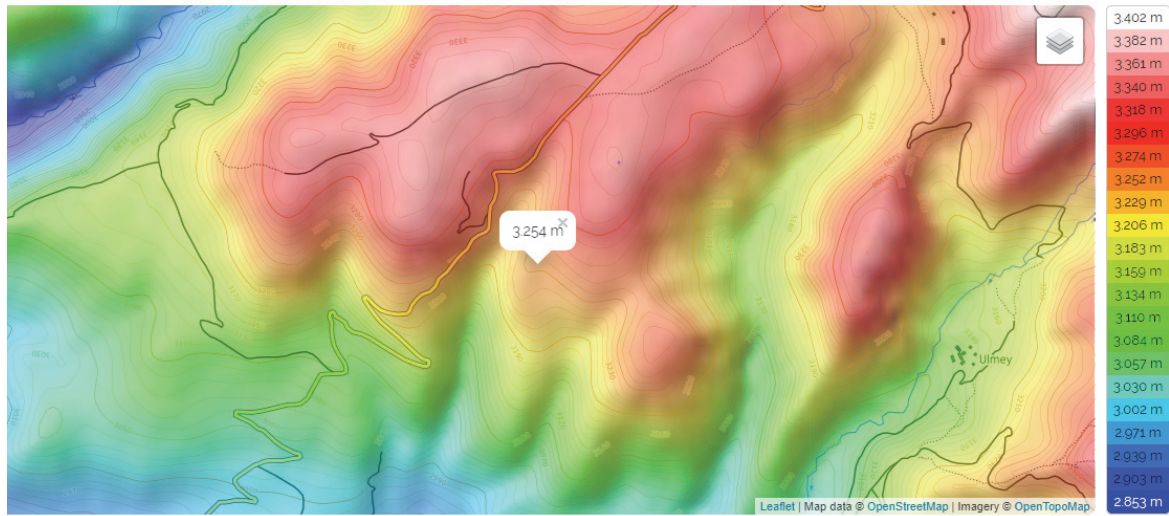

**Supplementary Figure S1.** Topographic map obtained from the website Topographic-map.com. Area of the experiment, Tuyo Alto, Marcará, Ancash, Peru.

Height number indicates experiment site, view at 300 m (1,000 ft) altitude

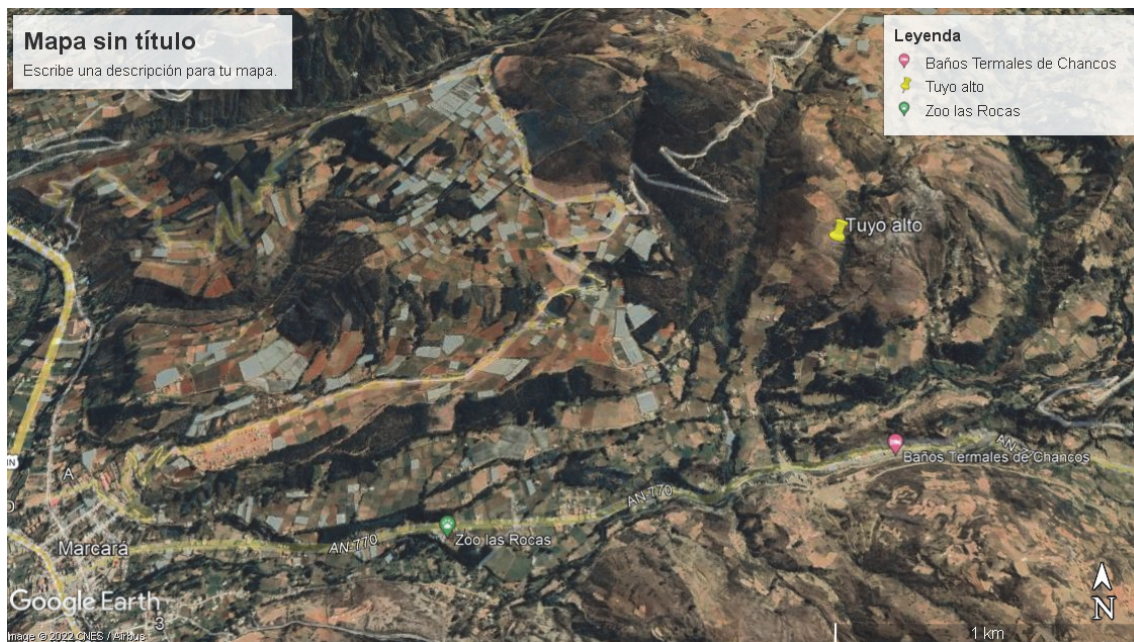

**Supplementary Figure S2.** Location of the experiment in Tuyo Alto, Marcará, Ancash, Peru, using images provided by Google Earth, whose location point is -Latitude 9°18'39.17" S; Longitude. 77°34'29.39" W, view at 1 km altitude

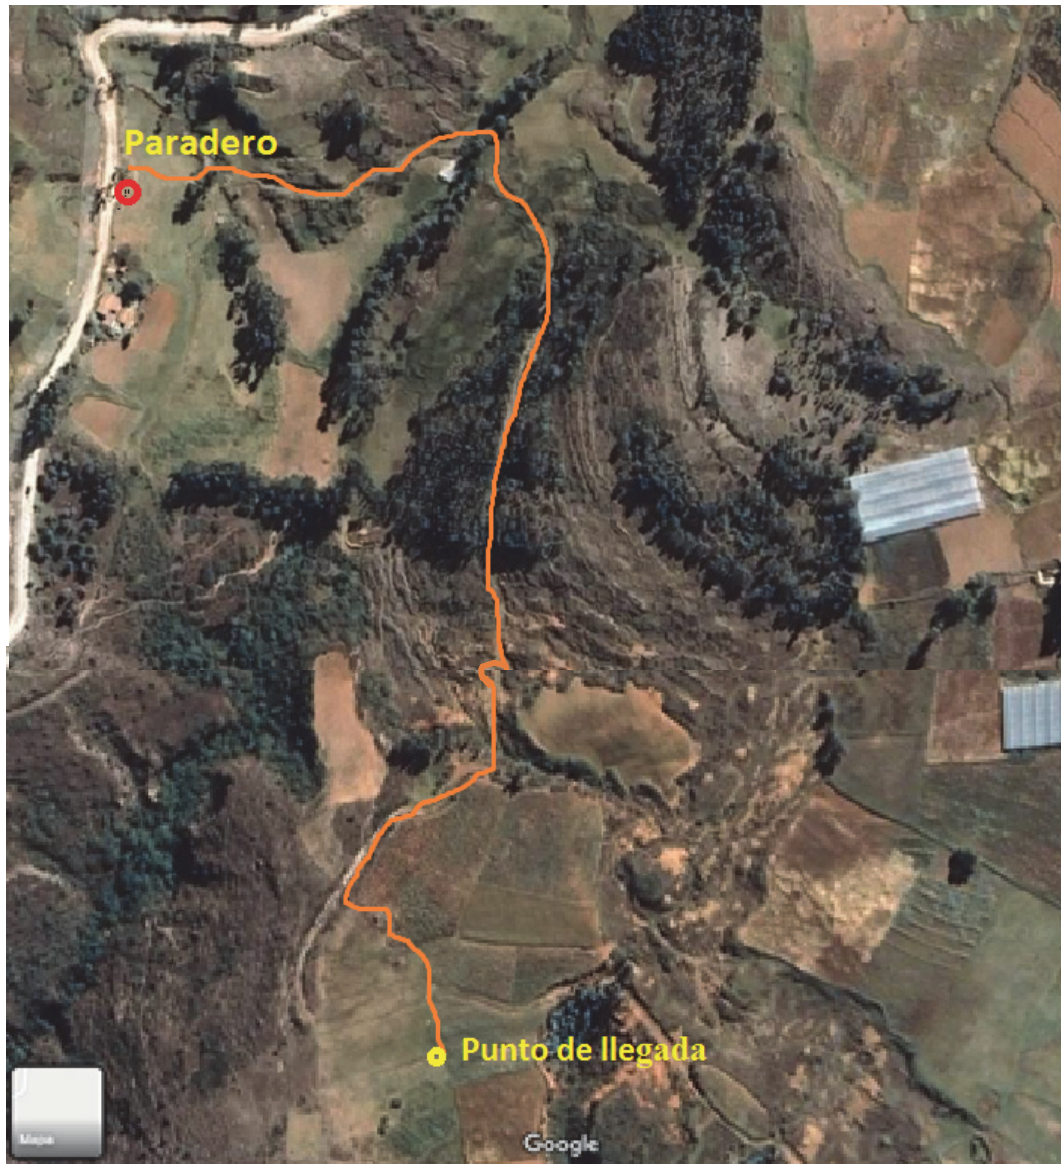

**Supplementary Figure S3.** Sketch of the experiment in Tuyu Alto, Marcara, Ancash, Peru, using images provided by Google Maps, whose location point is Latitude 9°18'39.17" S; Longitude. 77°34'29.39" W, view at 50 m altitude



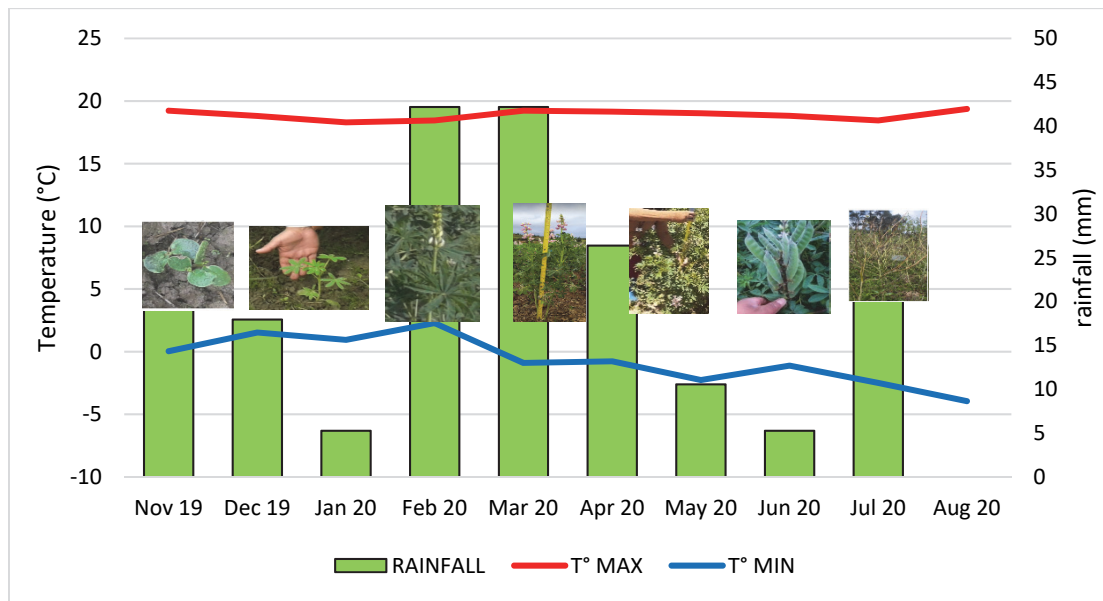

**Supplementary Figure S4.** Rainfall, maximum and minimum monthly temperature, presented during the phenological development of tarwi var. Andenes (Fuente: NASA Data Access Power)

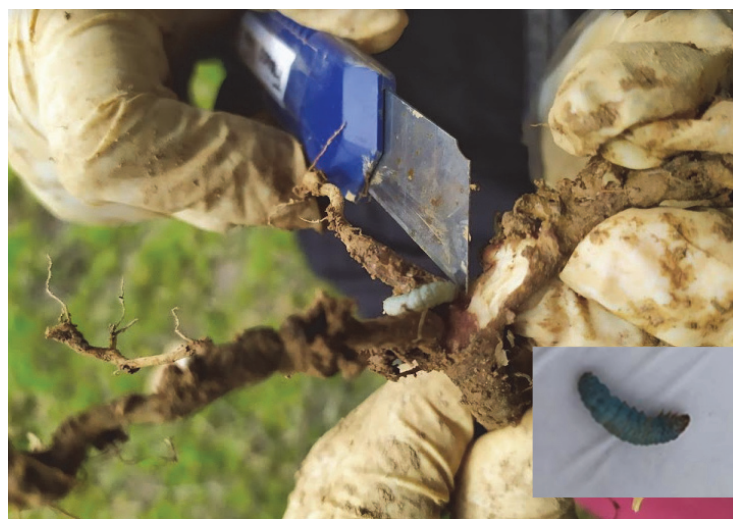

**Supplementary Figure S5.** Presence of turquoise larvae, Lepidoptera of the Pyralidae family, feeding on roots and nodules
